# Supplementary material for: Nutritional value of several commercially important river fish species from the Czech Republic
Source: PeerJ journal article supplement (doi:10.7717/peerj.5729), 2018-10-12
Supplement: P_Values_ANOVA-R_Table_2_and_3_and_figure_1.pdf [file P_Values_ANOVA-R_Table_2_and_3_and_figure_1.pdf]

FA\_14\_1

data: FA by Species

Kruskal-wallis chi-squared = 23.334, df = 6, p-value = 0.0006921

FA\_16\_0

data: FA by Species

Kruskal-wallis chi-squared = 42.942, df = 6, p-value = 1.198e-07

FA\_16\_1

data: FA by Species

Kruskal-wallis chi-squared = 60.047, df = 6, p-value = 4.404e-11

FA\_18\_0

Kruskal-wallis rank sum test

data: FA by Species

Kruskal-wallis chi-squared = 28.698, df = 6, p-value = 6.938e-05

FA\_18\_1n\_9

data: FA by Species

Kruskal-wallis chi-squared = 59.051, df = 6, p-value = 7.015e-11

FA\_18\_1n\_7

data: FA by Species

Kruskal-wallis chi-squared = 32.905, df = 6, p-value = 1.094e-05

FA\_18\_2n\_6

data: FA by Species

Kruskal-wallis chi-squared = 60.422, df = 6, p-value = 3.695e-11

FA\_18\_3n\_3

data: FA by Species

Kruskal-wallis chi-squared = 38.726, df = 6, p-value = 8.098e-07

FA\_20

data: FA by Species  
Kruskal-wallis chi-squared = 22.911, df = 6, p-value = 0.0008267

FA\_20\_1n\_9

data: FA by Species  
Kruskal-wallis chi-squared = 62.335, df = 6, p-value = 1.508e-11

FA\_20\_2n\_6

data: FA by Species  
Kruskal-wallis chi-squared = 47.176, df = 6, p-value = 1.726e-08

FA\_20\_4n\_6

data: FA by Species  
Kruskal-wallis chi-squared = 59.622, df = 6, p-value = 5.371e-11

FA\_20\_3n\_3

data: FA by Species  
Kruskal-wallis chi-squared = 58.423, df = 6, p-value = 9.404e-11

FA\_22

data: FA by Species  
Kruskal-wallis chi-squared = 22.911, df = 6, p-value = 0.0008267

FA\_22\_1

data: FA by Species  
Kruskal-wallis chi-squared = 20.275, df = 6, p-value = 0.002474

FA\_20\_5n\_3

data: FA by Species  
Kruskal-wallis chi-squared = 26.107, df = 6, p-value = 0.0002126

FA\_24\_1

data: FA by Species  
Kruskal-wallis chi-squared = 8.8036, df = 6, p-value = 0.1849

FA\_22\_5n\_3

data: FA by Species

Kruskal-wallis chi-squared = 56.728, df = 6, p-value = 2.074e-10

FA 22\_6n\_3

data: FA by Species

Kruskal-wallis chi-squared = 46.083, df = 6, p-value = 2.85e-08

FA 24\_0

data: FA by Species

Kruskal-wallis chi-squared = 39.077, df = 6, p-value = 6.912e-07

SFA

data: FA by Species

Kruskal-wallis chi-squared = 34.684, df = 6, p-value = 4.962e-06

MUFA

data: FA by Species

Kruskal-wallis chi-squared = 38.013, df = 6, p-value = 1.117e-06

PUFA

data: FA by Species

Kruskal-wallis chi-squared = 40.578, df = 6, p-value = 3.506e-07

N\_3\_PUFA

data: FA by Species

Kruskal-wallis chi-squared = 44.837, df = 6, p-value = 5.042e-08

N\_6\_PUFA

data: FA by Species

Kruskal-wallis chi-squared = 52.45, df = 6, p-value = 1.514e-09

N\_3\_HUFA

Kruskal-wallis rank sum test

data: FA by Species

Kruskal-wallis chi-squared = 44.837, df = 6, p-value = 5.042e-08

N\_3\_N\_6

data: FA by Species

Kruskal-wallis chi-squared = 56.829, df = 6, p-value = 1.979e-10

IA  
data: FA by Species  
Kruskal-wallis chi-squared = 29.489, df = 6, p-value =  
4.915e-0

IT  
data: FA by Species  
Kruskal-wallis chi-squared = 19.935, df = 6, p-value =  
0.002844

Dry matter

data: Dry by Species  
Kruskal-wallis chi-squared = 40.786, df = 6, p-value = 3.19e-07

Lipids

data: Lipids by Species  
Kruskal-wallis chi-squared = 45.88, df = 6, p-value = 3.128e-08

data: energy by Species  
Kruskal-Wallis chi-squared = 23.579, df = 6, p-value = 0.0006241

>  
Kruskal-wallis rank sum test

data: EPA+DHA by Species  
Kruskal-wallis chi-squared = 34.14, df = 6, p-value = 6.32e-06

Kruskal-Wallis rank sum test
