# Supplementary material for: Nutritional value of several commercially important river fish species from the Czech Republic
Source: PeerJ. 2018 Oct 12;6:e5729. doi: 10.7717/peerj.5729 (PMC6187990; doi:10.7717/peerj.5729)
Supplement: Supplemental Information 2 [file peerj-06-5729-s002.xlsx]

## Sheet: Correlation of lipid-FA Abramis
	Abramis brama
fish	Fat content	14:0								fish	Fat content	14:1							fish	Fat content	16:0
1	2.04	2.04284								1	2.04	0.319779							1	2.04	18.1412
2	2.73	2.3993								2	2.73	0.438815							2	2.73	18.1215
3	4.03	2.73909								3	4.03	0.350633							3	4.03	17.5323
4	1.55	2.37914								4	1.55	0.108408							4	1.55	21.459
5	0.67	0.639986								5	0.67	0.0585466							5	0.67	8.72829
6	0.78	1.55957								6	0.78	0							6	0.78	16.2036
7	1.04	0.167421								7	1.04	0.271098							7	1.04	14.588
8	2.08	2.59557								8	2.08	0.275119							8	2.08	19.7476
9	2.33	2.45726								9	2.33	0.575396							9	2.33	19.461
10	3.9	1.99956								10	3.9	0.438864							10	3.9	16.142
																			fish	Fat content	18:1n-9
fish	Fat content	16:1								fish	Fat content	18:0							1	2.04	19.249
1	2.04	8.54105								1	2.04	5.57202							2	2.73	22.4614
2	2.73	9.27934								2	2.73	5.52196							3	4.03	24.9921
3	4.03	13.2267								3	4.03	4.84219							4	1.55	3.08137
4	1.55	13.3782								4	1.55	5.84139							5	0.67	8.84334
5	0.67	2.68878								5	0.67	3.25959							6	0.78	25.9204
6	0.78	7.48275								6	0.78	5.13824							7	1.04	29.1511
7	1.04	7.60249								7	1.04	4.99796							8	2.08	18.8337
8	2.08	10.2397								8	2.08	5.02281							9	2.33	23.2535
9	2.33	9.69049								9	2.33	5.8478							10	3.9	25.4448
10	3.9	11.9511								10	3.9	5.13057
fish	Fat content	18:1n-7								fish	Fat content	18:2n-6							fish	Fat content	18:3n-3
1	2.04	7.29734								1	2.04	7.7965							1	2.04	2.81948
2	2.73	7.44708								2	2.73	8.48986							2	2.73	1.84412
3	4.03	7.68442								3	4.03	6.79903							3	4.03	1.98977
4	1.55	7.31703								4	1.55	13.3151							4	1.55	3.57272
5										5	0.67	4.38025							5	0.67	1.06011
6	0.78	4.96793								6	0.78	10.8244							6	0.78	3.44746
7	1.04	5.05195								7	1.04	11.8987							7	1.04	3.78484
8	2.08	7.08398								8	2.08	7.62048							8	2.08	2.66935
9	2.33	7.84533								9	2.33	9.1518							9	2.33	1.97748
10	3.9	7.6892								10	3.9	6.99984							10	3.9	2.2296
fish	Fat content	20:1n-9								fish	Fat content	20:2n-6							fish	Fat content	20:4n-6
1	2.04	0.72313								1	2.04	1.59597							1	2.04	3.95879
2	2.73	0.722324								2	2.73	1.84102							2	2.73	4.52693
3	4.03	0.666613								3	4.03	1.01054							3	4.03	2.66036
4	1.55	0.847508								4	1.55	0.957291							4	1.55	3.29531
5	0.67	0.337045								5	0.67	0.604753							5	0.67	2.72417
6	0.78	0.791655								6	0.78	1.18724							6	0.78	4.45675
7	1.04	0.865572								7	1.04	1.26663							7	1.04	4.21894
8	2.08	1.38616								8	2.08	1.46718							8	2.08	3.40054
9	2.33	0.766366								9	2.33	1.7337							9	2.33	4.51231
10	3.9	0.726043								10	3.9	1.10757							10	3.9	2.61596
fish	Fat content	20:3n-3								fish	Fat content	20:5n-3							fish	Fat content	22:5 n-3
1	2.04	0.616172								1	2.04	11.1935							1	2.04	2.67156
2	2.73	0.485037								2	2.73	9.0262							2	2.73	2.39979
3	4.03	0.456848								3	4.03	9.42704							3	4.03	0.982208
4	1.55	0.367093								4	1.55	11.3397							4	1.55	2.92854
5	0.67	0.226204								5	0.67	55.1341							5	0.67	2.09931
6	0.78	0.425563								6	0.78	6.8612							6	0.78	2.4263
7	1.04	0.502004								7	1.04	5.99925							7	1.04	2.46226
8	2.08	0.565553								8	2.08	10.0619							8	2.08	2.52131
9	2.33	0.567234								9	2.33	0.567234							9	2.33	2.32477
10	3.9	0.429344								10	3.9	9.59115							10	3.9	2.39211
fish	Fat content	22:6n-3
1	2.04	6.79584
2	2.73	4.50912
3	4.03	4.29166
4	1.55	8.95452
5	0.67	5.90834
6	0.78	7.53817
7	1.04	6.28163
8	2.08	5.86153
9	2.33	4.07745
10	3.9	4.54508

## Sheet: Perch
fish	Fat content	14:0								fish	Fat content	14:1								fish	Fat content	16:0
1	0.63	0.810236								1	0.63	0.873896								1	0.63	19.3052
2	0.62	1.10976								2	0.62	0.660588								2	0.62	18.4248
3	0.55	1.10117								3	0.55	0.64872								3	0.55	17.29
4	1.13	1.46376								4	1.13	1.05637								4	1.13	16.0468
5	0.64	0.810897								5	0.64	0.612091								5	0.64	19.4149
6	0.72	0.670558								6	0.72	0.049459								6	0.72	24.6876
7	0.73	1.2478								7	0.73	0.19096								7	0.73	23.7428
8	0.76	1.15736								8	0.76	0								8	0.76	25.0095
9	0.78	1.12936								9	0.78	0.0691873								9	0.78	26.1577
10	0.82	0.919154								10	0.82	0.0936653								10	0.82	22.9785
11	0.73	0.654381								11	0.73	0.055887								11	0.73	25.8909
12	0.77	1.08973								12	0.77	0.185422								12	0.77	23.2993
13	0.82	0.863394								13	0.82	0.0740549								13	0.82	23.7495
14	0.84	0.979572								14	0.84	0.0919158								14	0.84	25.6416
fish	Fat content	16:1								fish	Fat content	18:0								fish	Fat content	18:1n-9
1	0.63	3.01566								1	0.63	0.499828								1	0.63	3.53313
2	0.62	3.02991								2	0.62	0.413991								2	0.62	3.10777
3	0.55	2.99698								3	0.55	0.615671								3	0.55	4.40086
4	1.13	8.11457								4	1.13	1.61755								4	1.13	2.64861
5	0.64	4.29475								5	0.64	4.6407								5	0.64	8.759
6	0.72	2.62923								6	0.72	5.83946								6	0.72	9.17155
7	0.73	4.38425								7	0.73	5.61125								7	0.73	11.678
8	0.76	3.74491								8	0.76	6.14495								8	0.76	9.28173
9	0.78	4.43178								9	0.78	5.53441								9	0.78	9.12162
10	0.82	3.43725								10	0.82	5.688								10	0.82	9.22525
11	0.73	2.60099								11	0.73	6.58385								11	0.73	9.75078
12	0.77	3.82972								12	0.77	6.01071								12	0.77	10.4911
13	0.82	3.19018								13	0.82	6.34977								13	0.82	8.99996
14	0.84	4.25666								14	0.84	5.64391								14	0.84	9.01858
fish	Fat content	18:2n-6								fish	Fat content	18:3n-3								fish	Fat content	20:1n-9
1	0.63	3.34513								1	0.63	3.72647								1	0.63	1.84646
2	0.62	2.4405								2	0.62	3.41078								2	0.62	1.0925
3	0.55	3.38071								3	0.55	2.7837								3	0.55	1.1258
4	1.13	3.85603								4	1.13	3.93364								4	1.13	3.66482
5	0.64	2.93453								5	0.64	0.83139								5	0.64	0.667345
6	0.72	2.75181								6	0.72	1.34337								6	0.72	0.371889
7	0.73	2.94522								7	0.73	2.6913								7	0.73	0.425524
8	0.76	3.60625								8	0.76	1.22299								8	0.76	0
9	0.78	3.21171								9	0.78	1.01047								9	0.78	0.321056
10	0.82	3.5921								10	0.82	0.882836								10	0.82	0.639666
11	0.73	3.15721								11	0.73	1.52995								11	0.73	0.404604
12	0.77	2.84994								12	0.77	2.59314								12	0.77	0.405104
13	0.82	3.55915								13	0.82	1.16976								13	0.82	0.428016
14	0.84	3.09568								14	0.84	0.973525								14	0.84	0.320184
										fish	Fat content	20:4n-6								fish	Fat content	20:3n-3
fish	Fat content	20:2n-6								1	0.63	3.80678								1	0.63	10.602
1	0.63	0.461656								2	0.62	2.76408								2	0.62	0.421322
2	0.62	0.968862								3	0.55	3.7545								3	0.55	0.522175
3	0.55	1.54134								4	1.13	3.3842								4	1.13	0.748075
4	1.13	0.537025								5	0.64	11.1325								5	0.64	0.404343
5	0.64	0.281816								6	0.72	10.3946								6	0.72	0.353116
6	0.72	0.254067								7	0.73	9.01005								7	0.73	0.500145
7	0.73	0.255828								8	0.76	8.90582								8	0.76	0
8	0.76	0								9	0.78	8.97061								9	0.78	0.207411
9	0.78	0.333393								10	0.82	8.51346								10	0.82	0.214272
10	0.82	0.360469								11	0.73	12.0991								11	0.73	0.369144
11	0.73	0.26408								12	0.77	9.38217								12	0.77	0.478475
12	0.77	0.262221								13	0.82	8.91831								13	0.82	0.198889
13	0.82	0.283095								14	0.84	9.07913								14	0.84	0.216401
14	0.84	0.308516
fish	Fat content	20:5n-3								fish	Fat content	24:1								fish	Fat content	22:5 n-3
1	0.63	2.18851								1	0.63	4.0193								1	0.63	2.18851
2	0.62	2.64227								2	0.62	2.39793								2	0.62	2.64227
3	0.55	2.22432								3	0.55	2.64459								3	0.55	2.22432
4	1.13	2.65129								4	1.13	1.95549								4	1.13	2.65129
5	0.64	2.08645								5	0.64	2.54044								5	0.64	2.08645
6	0.72	5.78319								6	0.72	0.273596								6	0.72	2.57879
7	0.73	6.6212								7	0.73	0.18885								7	0.73	2.52169
8	0.76	5.11286								8	0.76	0								8	0.76	2.44569
9	0.78	4.32598								9	0.78	0								9	0.78	2.20765
10	0.82	4.83185								10	0.82	0.294925								10	0.82	2.68566
11	0.73	6.98304								11	0.73	0.315516								11	0.73	2.98282
12	0.77	7.04481								12	0.77	0.2405								12	0.77	2.59123
13	0.82	5.05424								13	0.82	0.252684								13	0.82	2.51622
14	0.84	4.33012								14	0.84	0.316939								14	0.84	2.18337
fish	Fat content	22:6n-3
1	0.63	27.8026
2	0.62	32.5262
3	0.55	22.9156
4	1.13	21.176
5	0.64	29.9172
6	0.72	28.6487
7	0.73	24.0768
8	0.76	29.5247
9	0.78	29.1623
10	0.82	31.2157
11	0.73	21.6996
12	0.77	25.4495
13	0.82	30.3388
14	0.84	29.8806

## Sheet: Crass
fish	Fat content	14:0
1	4.46	2.32783									fish	Fat content	14:1							fish	Fat content	16:0
2	2.03	1.70961									1	4.46	0.979226							1	4.46	17.2852
3	2.2	2.0036									2	2.03	0.861632							2	2.03	17.1668
4	4.49	3.0484									3	2.2	0.743293							3	2.2	15.2731
5	2.09	2.45076									4	4.49	1.25925							4	4.49	17.7507
6	1.67	1.38782									5	2.09	1.18057							5	2.09	16.3952
7											6	1.67	0.749696							6	1.67	16.4992
8	2.37	2.89624									7									7
9	2.64	1.86936									8	2.37	1.08905							8	2.37	13.265
10	1.78	2.13229									9	2.64	8.42557							9	2.64	12.4425
11	1.09	1.86816									10	1.78	0.157806							10	1.78	22.7091
12	0.91	1.93554									11	1.09	0.0899935							11	1.09	21.049
13	0.79	1.93853									12	0.91	0.112077							12	0.91	19.7317
											13	0.79	0.0689473							13	0.79	18.4862
fish	Fat content	16:1									fish	Fat content	18:0							fish	Fat content	18:1n-9
1	4.46	8.80821									1	4.46	1.04407							1	4.46	3.68725
2	2.03	5.21828									2	2.03	0.838781							2	2.03	5.28947
3	2.2	7.11906									3	2.2	0.878423							3	2.2	3.67731
4	4.49	9.50524									4	4.49	1.37689							4	4.49	2.96489
5	2.09	8.54229									5	2.09	1.04687							5	2.09	3.58031
6	1.67	3.84599									6	1.67	0.51544							6	1.67	5.84226
7											7									7
8	2.37	8.06307									8	2.37	0.617297							8	2.37	4.26309
9	2.64	6.76704									9	2.64	5.37721							9	2.64	3.67925
10	1.78	10.1257									10	1.78	5.96422							10	1.78	19.808
11	1.09	7.89852									11	1.09	6.30854							11	1.09	12.109
12	0.91	8.04796									12	0.91	5.88631							12	0.91	11.7652
13	0.79	5.88769									13	0.79	5.96733							13	0.79	16.0652
																				fish	Fat content	18:3n-3
											fish	Fat content	18:2n-6							1	4.46	7.58098
											1	4.46	6.82392							2	2.03	4.2121
											2	2.03	5.36351							3	2.2	9.32665
											3	2.2	12.4494							4	4.49	7.09366
											4	4.49	5.74719							5	2.09	7.90288
											5	2.09	7.83767							6	1.67	3.37008
											6	1.67	12.3089							7
											7									8	2.37	5.53398
											8	2.37	5.41008							9	2.64	3.96225
											9	2.64	7.4316							10	1.78	1.58021
											10	1.78	3.3097							11	1.09	3.27105
											11	1.09	3.92832							12	0.91	3.15686
											12	0.91	3.76325							13	0.79	3.07144
											13	0.79	9.32262
fish	Fat content	20:1n-9									fish	Fat content	20:2n-6							fish	Fat content
1	4.46	1.77156									1	4.46	3.31487							1	4.46
2	2.03	1.4168									2	2.03	8.61357							2	2.03
3	2.2	1.3793									3	2.2	3.5066							3	2.2
4	4.49	1.14096									4	4.49	3.53791							4	4.49
5	2.09	1.50505									5	2.09	3.71811							5	2.09
6	1.67	1.97914									6	1.67	3.809							6	1.67
7											7									7
8	2.37	1.78486									8	2.37	5.67617							8	2.37
9	2.64	1.40636									9	2.64	3.93459							9	2.64
10	1.78	1.11282									10	1.78	0.483748							10	1.78
11	1.09	1.07855									11	1.09	0.781618							11	1.09
12	0.91	0.95146									12	0.91	7.61617							12	0.91
13	0.79	1.67288									13	0.79	0.777188							13	0.79
fish	Fat content	20:4n-6									fish	Fat content	20:3n-3
1	4.46	0.408248									1	4.46	3.7857
2	2.03	0.621564									2	2.03	5.80317
3	2.2	0.897193									3	2.2	5.17045
4	4.49	0.59687									4	4.49	3.59404
5	2.09	0.644158									5	2.09	5.25422
6	1.67	0.691544									6	1.67	5.92325
7											7
8	2.37	0.463618									8	2.37	4.24741
9	2.64	0.481649									9	2.64	4.31096
10	1.78	3.95235									10	1.78	0.398545
11	1.09	6.52683									11	1.09	0.734768
12	0.91	5.26315									12	0.91	0.624254
13	0.79	4.98176									13	0.79	0.508278
fish	Fat content	22:1									fish	Fat content	20:5n-3
1	4.46	1.10219									1	4.46	2.15192
2	2.03	0.965969									2	2.03	3.39577
3	2.2	1.10849									3	2.2	2.55309
4	4.49	1.21509									4	4.49	2.84527
5	2.09	1.16145									5	2.09	2.66787
6	1.67	0.697171									6	1.67	2.4645
7											7
8	2.37	1.69658									8	2.37	4.41917
9	2.64	0.998582									9	2.64	3.21972
10	1.78	0.065998									10	1.78	4.87669
11	1.09	0.0639249									11	1.09	6.95335
12	0.91	0.084174									12	0.91	6.78647
13	0.79	0.150754									13	0.79	6.05576
fish	Fat content	24:1									fish	Fat content	22:5 n-3
1	4.46	0.752625									1	4.46	2.15192
2	2.03	1.70872									2	2.03	3.39577
3	2.2	0.769917									3	2.2	2.55309
4	4.49	0.837847									4	4.49	2.84527
5	2.09	0.945387									5	2.09	2.66787
6	1.67	1.85663									6	1.67	2.4645
7											7
8	2.37	2.25167									8	2.37	4.41917
9	2.64	1.63269									9	2.64	3.21972
10	1.78	0									10	1.78	2.24547
11	1.09	0									11	1.09	2.85696
12	0.91	0									12	0.91	2.5371
13	0.79	0.131997									13	0.79	2.27568
fish	Fat content	22:6n-3
1	4.46	7.38767
2	2.03	16.4625
3	2.2	7.17964
4	4.49	8.42248
5	2.09	9.61678
6	1.67	17.4627
7
8	2.37	17.5515
9	2.64	14.279
10	1.78	15.132
11	1.09	19.2237
12	0.91	16.6386
13	0.79	17.5209

## Sheet: Condorostmata
fish	Fat content	14:0									fish	Fat content	14:1
1	5.88	2.44027									1	5.88	0.374465
2	3.97	1.94043									2	3.97	0.252587
3	2.18	3.09957									3	2.18	0.239789
4	3.14	2.47931									4	3.14	0.298489
5	2.81	1.75992									5	2.81	0.321872
6	3.14	1.91715									6	3.14	0.226498
7	3.17	2.1485									7	3.17	0.195395
8	3.35	4.21941									8	3.35	0.109265
9	6.19	3.99991									9	6.19	0.109498
10	5.4	1.83368									10	5.4	0.129409
11	3.53	3.77011									11	3.53	0.130894
											fish	Fat content	16:1
fish	Fat content	16:0									1	5.88	15.3093
1	5.88	13.0551									2	3.97	17.1283
2	3.97	13.4489									3	2.18	14.4817
3	2.18	14.7084									4	3.14	18.0096
4	3.14	16.336									5	2.81	15.2911
5	2.81	12.902									6	3.14	13.7042
6	3.14	14.2484									7	3.17	1.92286
7	3.17	17.571									8	3.35	16.7476
8	3.35	21.1981									9	6.19	22.2692
9	6.19	19.3767									10	5.4	13.8427
10	5.4	15.1517									11	3.53	16.2847
11	3.53	20.0644
											fish	Fat content	18:1n-9
fish	Fat content	18:0									1	5.88	17.8611
1	5.88	2.22524									2	3.97	19.5139
2	3.97	2.89611									3	2.18	14.3441
3	2.18	3.6133									4	3.14	15.8321
4	3.14	3.0604									5	2.81	19.6244
5	2.81	3.21151									6	3.14	17.7838
6	3.14	3.08835									7	3.17	16.5823
7	3.17	3.44216									8	3.35	16.4159
8	3.35	3.17941									9	6.19	14.715
9	6.19	2.77506									10	5.4	20.2278
10	5.4	3.414									11	3.53	15.3677
11	3.53	3.11707
											fish	Fat content	18:2n-6
fish	Fat content	18:1n-3									1	5.88	6.37181
1	5.88	4.48571									2	3.97	5.1306
2	3.97	5.22989									3	2.18	4.03552
3	2.18	4.8407									4	3.14	4.04087
4	3.14	4.98371									5	2.81	4.9646
5	2.81	5.58606									6	3.14	6.48539
6	3.14	4.99837									7	3.17	5.33097
7	3.17	5.59117									8	3.35	4.78958
											9	6.19	2.1749
											10	5.4	8.03804
											11	3.53	5.17015
											fish	Fat content	20:2n-6
											1	5.88	0.372733
fish	Fat content	20:1n-9									2	3.97	0.325143
2	3.97	1.65224									3	2.18	0.323931
3	2.18	1.14376									4	3.14	0.266945
4	3.14	1.0066									5	2.81	0.52122
5	2.81	1.65118									6	3.14	0.581619
6	3.14	1.4837									7	3.17	0.414416
7	3.17	1.41149									8	3.35	0.417933
8	3.35	0.945043									9	6.19	0.236369
9	6.19	1.01121									10	5.4	0.472457
10	5.4	0.746837									11	3.53	0.415393
11	3.53	0.927829
fish	Fat content	20:4n-6									fish	Fat content	20:3n-3
1	5.88	0.782599									1	5.88	0.291813
2	3.97	0.982701									2	3.97	0.237505
3	2.18	1.3804									3	2.18	0.539851
4	3.14	1.12963									4	3.14	0.235367
5	2.81	1.63439									5	2.81	0.34024
6	3.14	1.28209									6	3.14	0.350749
7	3.17	1.28469									7	3.17	0.462685
8	3.35	1.31539									8	3.35	0.705793
9	6.19	0.937348									9	6.19	0.263023
11	3.53	1.22033									10	5.4	0.164396
											11	3.53	0.799055
fish	Fat content	20:5n-3									fish	Fat content	22:5 n-3
1	5.88	2.42184									1	5.88	2.42184
2	3.97	2.89189									2	3.97	2.89189
3	2.18	3.68572									3	2.18	3.68572
4	3.14	2.89233									4	3.14	2.89233
5	2.81	3.90481									5	2.81	3.90481
6	3.14	3.45503									6	3.14	3.45503
7	3.17	3.91631									7	3.17	3.91631
10	5.4	8.75341									8	3.35	2.49934
											9	6.19	2.74923
											10	5.4	1.83593
											11	3.53	2.96762
fish	Fat content	22:6n-3
1	5.88	5.13393
2	3.97	7.12978
3	2.18	8.77045
4	3.14	8.40236
5	2.81	10.3787
6	3.14	8.29239
7	3.17	11.7983
8	3.35	5.4463
9	6.19	5.23049
10	5.4	3.49592
11	3.53	6.53012

## Sheet: Brown trout
fish	Fat content	14:0													fish	Fat content	14:1
1	1.64	0.671574													1	1.64	0.0875577
2	3	2.13762													2	3	0.350333
3	2.44	1.66104													3	2.44	0.495374
4	5.15	2.28353													4	5.15	0.405458
5	4.48	2.30099													5	4.48	0.543198
6	3.44	1.79803													6	3.44	0.348366
7	3.09	2.12126													7	3.09	0.363222
8	2.4	1.88913													8	2.4	0.504271
9	4.07	2.27844													9	4.07	0.228531
10	2.69	2.96754													10	2.69	0.255149
11	4.09	2.2445													11	4.09	0.210484
12	2.88	1.03849													12	2.88	0.0897923
															fish	Fat content	16:1
fish	Fat content	16:0													1	1.64	2.68293
1	1.64	17.236													2	3	10.6848
2	3	22.483													3	2.44	5.42051
3	2.44	15.0571													4	5.15	11.2613
4	5.15	21.7682													5	4.48	8.18266
5	4.48	16.6124													6	3.44	9.51051
6	3.44	21.0056													7	3.09	10.2365
7	3.09	23.1427													8	2.4	9.28027
8	2.4	20.1904													9	4.07	8.68836
9	4.07	19.2436													10	2.69	7.98329
10	2.69	19.98													11	4.09	8.27277
11	4.09	19.2632													12	2.88	2.86913
															fish	Fat content	18:1n-9
fish	Fat content	18:0													2	3	15.138
1	1.64	6.19566													3	2.44	16.0903
2	3	4.35382													4	5.15	16.5751
3	2.44	4.30333													5	4.48	21.2133
4	5.15	4.3995													6	3.44	18.7429
5	4.48	3.60868													7	3.09	13.1043
6	3.44	4.3944													8	2.4	17.123
7	3.09	4.57789													9	4.07	27.7594
8	2.4	4.75272													10	2.69	20.4387
9	4.07	5.49082													11	4.09	27.8048
10	2.69	6.14433
11	4.09	5.58325
12	2.88	2.19199
fish	Fat content	18:1n-3													fish	Fat content	18:2n-6
1	1.64	2.47947													1	1.64	3.3036
2	3	5.59559													2	3	4.01591
3	2.44	3.78887													3	2.44	5.69493
4	5.15	5.64362													4	5.15	4.3421
5	4.48	4.67636													5	4.48	5.61551
6	3.44	5.23202													6	3.44	5.64348
7	3.09	6.31148													7	3.09	4.06346
8	2.4	5.59023													8	2.4	5.72674
															9	4.07	10.6072
															10	2.69	8.45901
															11	4.09	10.3809
															12	2.88	3.08318
fish	Fat content	18:3n-3													fish	Fat content	20:1n-9
1	1.64	3.5674													1	1.64	0.18358
2	3	12.2422													2	3	0.418599
3	2.44	3.6909													3	2.44	1.27984
4	5.15	12.2796													4	5.15	0.458012
5	4.48	3.74207													5	4.48	1.75654
6	3.44	12.0779													6	3.44	0.337333
7	3.09	13.5309													7	3.09	0.232653
8	2.4	8.35492													8	2.4	0.403399
9	4.07	3.43876													9	4.07	1.40831
10	2.69	3.45281													10	2.69	1.20293
11	4.09	3.44013													11	4.09	1.53041
12	2.88	1.2239													12	2.88	0.377609
fish	Fat content	20:2n-6													fish	Fat content	20:4n-6
1	1.64	0.129514													1	1.64	6.42942
2	3	0.0524779													2	3	1.68588
3	2.44	0.33899													3	2.44	3.2897
4	5.15	0.0739546													4	5.15	1.62111
5	4.48	0.7533													5	4.48	2.63163
6	3.44	0.167001													6	3.44	1.62926
7	3.09	0.0885038													7	3.09	1.54896
8	2.4	0.133233													8	2.4	2.40936
9	4.07	2.04384													9	4.07	3.35013
10	2.69	1.71818													10	2.69	3.62071
11	4.09	2.06629													11	4.09	3.34819
12	2.88	0.617478													12	2.88	1.19295
															fish	Fat content	20:5n-3
fish	Fat content	20:3n-3													1	1.64	1.26133
1	1.64	0.28186													2	3	2.20851
2	3	0.724928													3	2.44	1.95772
3	2.44	0.745374													4	5.15	1.41901
4	5.15	0.68215													5	4.48	1.68781
5	4.48	0.907152													6	3.44	1.4665
6	3.44	0.790951													7	3.09	1.33713
7	3.09	0.927284													8	2.4	1.69468
8	2.4	0.524113													9	4.07	2.53246
9	4.07	0.569335													10	2.69	4.76501
10	2.69	0.473234													11	4.09	2.44508
11	4.09	0.57644													12	2.88	1.53885
12	2.88	0.166586
															fish	Fat content	22:5 n-3
fish	Fat content	24:1													1	1.64	1.26133
1	1.64	2.98993													2	3	2.20851
2	3	1.42453													3	2.44	1.95772
3	2.44	1.99324													4	5.15	1.41901
4	5.15	1.60858													5	4.48	1.68781
5	4.48	1.74775													6	3.44	1.4665
6	3.44	1.52554													7	3.09	1.33713
7	3.09	1.45614													8	2.4	1.69468
8	2.4	1.85836													9	4.07	1.39221
9	4.07	0													10	2.69	2.52901
10	2.69	0.160009													11	4.09	1.40741
11	4.09	0.132524													12	2.88	0.865009
12	2.88	0.0536756
fish	Fat content	22:6n-3
1	1.64	32.6744
2	3	10.0346
3	2.44	28.401
4	5.15	8.85818
5	4.48	18.7096
6	3.44	8.57451
7	3.09	10.0672
8	2.4	11.8136
9	4.07	5.73303
10	2.69	10.1008
11	4.09	5.89248
12	2.88	3.15733

## Sheet: Grayling
fish	Fat content	14:0												fish	Fat content	16:0
1	5.16	1.8526												1	5.16	10.6557
2	1.41	1.1955												2	1.41	9.4304
3	3.37	1.68246												3	3.37	9.87636
4	2.58	1.6142												4	2.58	8.75562
5	3.94	1.46799												5	3.94	0.00826209
6	4.09	1.8109												6	4.09	9.76768
7	3.28972	2.43146												7	3.28972	14.2048
8	2.18692	2.27592												8	2.18692	14.8607
9	2.33333	2.50119												9	2.33333	14.8236
10	0.970874	1.44792												10	0.970874	14.4441
11	2.06452	2.48165												11	2.06452	13.8292
12	0.904348	1.09002												12	0.904348	17.4191
13	2.92623	3.03329												13	2.92623	15.2381
14	2.3125	2.29764												14	2.3125	14.2719
fish	Fat content	16:1												fish	Fat content	18:0
1	5.16	4.75019												1	5.16	2.38512
2	1.41	1.67515												2	1.41	2.32399
3	3.37	3.70687												3	3.37	2.26816
4	2.58	2.12513												4	2.58	2.38988
5	3.94	2.67042												5	3.94	2.14902
6	4.09	3.58815												6	4.09	2.41416
7	3.28972	5.4658												7	3.28972	2.88912
8	2.18692	3.90181												8	2.18692	3.86433
9	2.33333	4.11357												9	2.33333	2.98874
10	0.970874	2.59344												10	0.970874	3.32349
11	2.06452	4.18249												11	2.06452	3.25973
12	0.904348	1.77408												12	0.904348	3.80804
13	2.92623	5.97953												13	2.92623	2.83875
14	2.3125	3.48582												14	2.3125	3.33022
														fish	Fat content	18:2n-6
	fish	Fat content	18:1n-9											1	5.16	16.6915
	1	5.16	41.6531											2	1.41	15.1025
	2	1.41	38.0315											3	3.37	14.5629
	3	3.37	40.5251											4	2.58	16.9692
	4	2.58	43.9873											5	3.94	18.9881
	5	3.94	52.0923											6	4.09	16.9619
	6	4.09	43.0487											7	3.28972	16.7052
	7	3.28972	29.4681											8	2.18692	19.044
	8	2.18692	29.8287											9	2.33333	18.6845
	9	2.33333	29.7662											10	0.970874	12.6765
	10	0.970874	24.4489											11	2.06452	17.1161
	11	2.06452	27.9606											12	0.904348	8.49183
	12	0.904348	16.4383											13	2.92623	18.0352
	13	2.92623	29.7128											14	2.3125	18.0989
	14	2.3125	30.7841
fish	Fat content	18:3n-3												fish	Fat content	20:1n-9
1	5.16	2.737												1	5.16	2.9166
2	1.41	2.45118												2	1.41	3.18024
3	3.37	3.53424												3	3.37	2.92993
4	2.58	3.0657												4	2.58	3.56234
5	3.94	3.73261												5	3.94	3.20819
6	4.09	3.36795												6	4.09	2.73031
7	3.28972	2.19224												7	3.28972	1.78596
8	2.18692	2.50425												8	2.18692	2.09041
9	2.33333	2.38884												9	2.33333	2.50497
10	0.970874	1.54114												10	0.970874	2.54498
11	2.06452	2.12462												11	2.06452	2.9713
12	0.904348	1.4039												12	0.904348	1.21822
13	2.92623	1.96877												13	2.92623	2.69923
14	2.3125	2.57795												14	2.3125	2.54704
														fish	Fat content	20:4n-6
fish	Fat content	20:2n-6												1	5.16	0.622082
1	5.16	0.5062												2	1.41	0.90617
2	1.41	0.390875												3	3.37	1.0157
3	3.37	0.500956												4	2.58	0.468593
4	2.58	0.523258												5	3.94	0.411914
5	3.94	0.382807												6	4.09	0.616684
6	4.09	0.487518												7	3.28972	1.01248
7	3.28972	6.95351												8	2.18692	1.12683
8	2.18692	0.96116												9	2.33333	1.2773
9	2.33333	0.87182												10	0.970874	2.00572
10	0.970874	0.851878												11	2.06452	1.25222
11	2.06452	0.884919												12	0.904348	2.5026
12	0.904348	0.640229												13	2.92623	0.933581
13	2.92623	0.839225												14	2.3125	1.25127
14	2.3125	0.864533
fish	Fat content	20:3n-3												fish	Fat content	20:5n-3
1	5.16	0.18346												1	5.16	0.652668
2	1.41	0.145911												2	1.41	1.02002
3	3.37	0.297658												3	3.37	0.996971
4	2.58	0.208218												4	2.58	0.809426
5	3.94	0.159925												5	3.94	0.685368
6	4.09	0.200892												6	4.09	0.70027
7	3.28972	0.133936												7	3.28972	2.59411
8	2.18692	0.160232												8	2.18692	2.91476
9	2.33333	0.195798												9	2.33333	2.93448
10	0.970874	0.154949												10	0.970874	4.59028
11	2.06452	0.262408												11	2.06452	3.65129
12	0.904348	0.173902												12	0.904348	5.33004
13	2.92623	0.172988												13	2.92623	2.70095
14	2.3125	0.183942												14	2.3125	2.82943
														fish	Fat content	22:6n-3
fish	Fat content	22:5 n-3												1	5.16	7.01768
1	5.16	0.652668												2	1.41	15.2616
2	1.41	1.02002												3	3.37	9.17987
3	3.37	0.996971												4	2.58	8.23765
4	2.58	0.809426												5	3.94	7.0589
5	3.94	0.685368												6	4.09	7.78882
6	4.09	0.70027												7	3.28972	9.17016
7	3.28972	1.03982												8	2.18692	11.5444
8	2.18692	0.936688												9	2.33333	11.9741
9	2.33333	1.17725												10	0.970874
10	0.970874	1.60327												11	2.06452	14.5904
11	2.06452	1.64368												12	0.904348
12	0.904348	1.75322												13	2.92623	10.5358
13	2.92623	1.02489												14	2.3125	12.0115
14	2.3125	1.09857
														fish	Fat content
fish	Fat content													1	5.16
1	5.16													2	1.41
2	1.41													3	3.37
3	3.37													4	2.58
4	2.58													5	3.94
5	3.94													6	4.09
6	4.09													7	3.28972
7	3.28972													8	2.18692
8	2.18692													9	2.33333
9	2.33333													10	0.970874
10	0.970874													11	2.06452
11	2.06452													12	0.904348
12	0.904348													13	2.92623
13	2.92623													14	2.3125
14	2.3125

## Sheet: Chub
fish	Fat content	14:0														fish	Fat content	14:1
1	3.58	2.1369														1	3.58	0.548966
2	3.77	2.09804														2	3.77	0.590866
3	2.14	1.76166														3	2.14	0.825107
4	2.98	1.76673														4	2.98	0.804176
5	2.17	1.24147														5	2.17	0.752272
6	3.79169	1.9758														6	3.79169	0.438713
7	3.79393	2.00691														7	3.79393	0.462219
8	3.67421	2.06501														8	3.67421	0.461941
9	3.91006	1.88611														9	3.91006	0.421471
10	4.18759	2.36875														10	4.18759	0.470785
fish	Fat content	16:0														fish	Fat content	16:1
1	3.58	16.3397														1	3.58	11.6826
2	3.77	16.9487														2	3.77	13.3364
3	2.14	16.2576														3	2.14	10.6891
4	2.98	15.8095														4	2.98	11.8148
5	2.17	15.1565														5	2.17	5.33836
6	3.79169	18.0127														6	3.79169	9.33896
7	3.79393	17.9633														7	3.79393	9.1451
8	3.67421	17.882														8	3.67421	9.16178
9	3.91006	17.6777														9	3.91006	9.18221
10	4.18759	18.8466														10	4.18759	10.164
fish	Fat content	18:0														fish	Fat content	18:1n-9
1	3.58	2.84923														1	3.58	23.2213
2	3.77	2.49567														2	3.77	24.5061
3	2.14	3.1982														3	2.14	20.4937
4	2.98	2.90045														4	2.98	21.0853
5	2.17	4.13002														5	2.17	14.6993
6	3.79169	3.51826														6	3.79169	21.5807
7	3.79393	3.44032														7	3.79393	21.4011
8	3.67421	3.40871														8	3.67421	21.2155
9	3.91006	3.46306														9	3.91006	21.1126
10	4.18759	3.23187														10	4.18759	22.9381
																fish	Fat content	18:3n-3
fish	Fat content	18:2n-6														1	3.58	4.77133
1	3.58	3.98662														2	3.77	4.83074
2	3.77	3.87781														3	2.14	4.46394
3	2.14	4.11089														4	2.98	5.19391
4	2.98	4.14276														5	2.17	3.87957
5	2.17	4.24208														6	3.79169	5.44856
6	3.79169	12.166														7	3.79393	5.55292
7	3.79393	12.3787														8	3.67421	5.33328
8	3.67421	12.0987														9	3.91006	5.4383
9	3.91006	12.3361														10	4.18759	5.02424
10	4.18759	12.9502
fish	Fat content	20:1n-9														fish	Fat content	20:2n-6
1	3.58	1.03321														1	3.58	3.2712
2	3.77	0.953068														2	3.77	2.37606
3	2.14	0.837899														3	2.14	0.345681
4	2.98	0.867851														4	2.98	0.228987
5	2.17	0.650602														5	2.17	0.421238
6	3.79169	1.05789														6	3.79169	0.771553
7	3.79393	0.980158														7	3.79393	0.821709
8	3.67421	0.973848														8	3.67421	0.762693
9	3.91006	0.97283														9	3.91006	0.763632
10	4.18759	0.918986														10	4.18759	0.671028
fish	Fat content	20:4n-6														fish	Fat content	20:3n-3
1	3.58	3.30776														1	3.58	0.993149
2	3.77	3.0729														2	3.77	0.982508
3	2.14	4.04312														3	2.14	0.988237
4	2.98	3.35042														4	2.98	1.09482
5	2.17	5.3645														5	2.17	0.852936
6	3.79169	4.09494														6	3.79169	0.687962
7	3.79393	4.158														7	3.79393	0.709106
8	3.67421	3.97919														8	3.67421	0.690516
9	3.91006	4.01536														9	3.91006	0.672067
10	4.18759	3.30018														10	4.18759	0.550955
fish	Fat content	20:5n-3
1	3.58	1.57298
2	3.77	1.88641													fish	Fat content	24:1
3	2.14	1.92217													1	3.58	0.651916
4	2.98	1.67266													2	3.77	0.485266
5	2.17	2.69056													3	2.14	2.00279
6	3.79169	5.04902													4	2.98	0.644646
7	3.79393	5.03566													5	2.17	0.72541
8	3.67421	4.96443													6	3.79169	0.0825405
9	3.91006	4.93506													7	3.79393	0.104625
10	4.18759	4.13877													8	3.67421	0.0753107
															9	3.91006	0.0936106
															10	4.18759	0.0548719
															fish	Fat content	22:6n-3
															1	3.58	12.685
fish	Fat content	22:5 n-3													2	3.77	10.6212
1	3.58	1.57298													3	2.14	17.7816
2	3.77	1.88641													4	2.98	13.6965
3	2.14	1.92217													5	2.17	16.4758
4	2.98	1.67266													6	3.79169	7.10086
5	2.17	2.69056													7	3.79393	7.13773
6	3.79169	1.95716													8	3.67421	7.09552
7	3.79393	1.97438													9	3.91006	6.92342
8	3.67421	1.90815													10	4.18759	5.23316
9	3.91006	1.8837
10	4.18759	1.46493
