# Supplementary material for: Nutritional value of several commercially important river fish species from the Czech Republic
Source: PeerJ. 2018 Oct 12;6:e5729. doi: 10.7717/peerj.5729 (PMC6187990; doi:10.7717/peerj.5729)
Supplement: Supplemental Information 4 [file peerj-06-5729-s004.xlsx]

## Sheet: FAs
																																						Perca fluviatilis							Average	STDEV
					Abramis brama
																			Abramis						Average				Perch
	cejn velký	cejn velký	cejn velký	cejn velký	cejn velký	cejn velký	cejn velký	cejn velký	cejn velký	cejn velký																									okoun říční	okoun říční	okoun říční	okoun říční	okoun říční	okoun říční	okoun říční	okoun říční	okoun říční	okoun říční
sample	14	15	16	62	63	38	43	19	20	21		sample																						sample	22	23	24	25	26	28	29	30	31	32
Fat content	2.04	2.73	4.03	1.55	0.67	0.78	1.04	2.08	2.33	3.9		obsah tuku Fat content		Fat content	2.13	1.06	1.09	3.02	2.49	3.45	0.75	3.56	1.25	4.2				0.63	0.62	0.55	1.13	0.64	Fat content	obsah tuku Fat content		0.72	0.73	0.76	0.78	0.82	0.73	0.77	0.82	0.84				Fat content	4.46
14:0	2.04284	2.3993	2.73909	2.37914	0.639986	1.55957	0.167421	2.59557	2.45726	1.99956		14:0		14:00:00	2.58985	1.48771	2.01717	2.22018	1.45383	2.01102	1.02004	3.65104	2.83064	2.0733	2.01673	0.799689		0.810236	1.10976	1.10117	1.46376	0.810897	14:00:00	14:0	0.900089	0.670558	1.2478	1.15736	1.12936	0.919154	0.654381	1.08973	0.863394	0.979572	0.993816	0.22089		14:00:00	2.32783
14:1	0.319779	0.438815	0.350633	0.108408	0.0585466	0	0.271098	0.275119	0.575396	0.438864		14:1		14:01:00	1.21018	0.706485	0.858279	0.88048	0.704188	0.797442	0.439316	1.73379	1.36693	0.833375	0.618356	0.448851		0.873896	0.660588	0.64872	1.05637	0.612091	14:01:00	14:1	0.0989823	0.049459	0.19096	0	0.0691873	0.0936653	0.055887	0.185422	0.0740549	0.0919158	0.317413	0.34989		14:01:00	0.979226
16:0	18.1412	18.1215	17.5323	21.459	8.72829	16.2036	14.588	19.7476	19.461	16.142		16:0		16:0	17.9247	18.5772	18.4609	16.4761	3.79161	18.4039	17.4146	1.73379	1.36693	0.833375	14.2554	6.81503		19.3052	18.4248	17.29	16.0468	19.4149	16:0	16:0	24.0483	24.6876	23.7428	25.0095	26.1577	22.9785	25.8909	23.2993	23.7495	25.6416	22.3792	3.34985		16:0	17.2852
16:1	8.54105	9.27934	13.2267	13.3782	2.68878	7.48275	7.60249	10.2397	9.69049	11.9511		16:1		16:01:00	7.67064	5.39104	6.30092	8.03841	3.79161	8.73811	2.83937	23.4142	20.1387	15.2906	9.78471	5.32807		3.01566	3.02991	2.99698	8.11457	4.29475	16:01:00	16:1	3.81025	2.62923	4.38425	3.74491	4.43178	3.43725	2.60099	3.82972	3.19018	4.25666	3.85114	1.33468		16:01:00	8.80821
18:0	5.57202	5.52196	4.84219	5.84139	3.25959	5.13824	4.99796	5.02281	5.8478	5.13057		18:0		18:00:00	4.266	6.04844	5.80134	4.33775	8.04983	3.70783	6.40972	12.6461	8.80476	8.39814	5.98222	2.12733		0.499828	0.413991	0.615671	1.61755	4.6407	18:00:00	18:0	5.8094	5.83946	5.61125	6.14495	5.53441	5.688	6.58385	6.01071	6.34977	5.64391	4.4669	2.35102		18:00:00	1.04407
18:1n-9	19.249	22.4614	24.9921	3.08137	8.84334	25.9204	29.1511	18.8337	23.2535	25.4448		18:1n-9		18:1n-9	21.2293	15.9615	16.4729	30.0791	13.5619	33.3969	9.97086	5.87855	7.05316	3.64896	17.9242	9.1887		3.53313	3.10777	4.40086	2.64861	8.759	18:1n-9	18:1n-9	9.8127	9.17155	11.678	9.28173	9.12162	9.22525	9.75078	10.4911	8.99996	9.01858	7.93338	2.92628		18:1n-9	3.68725
18:1n-7	7.29734	7.44708	7.68442	7.31703	2.90876	4.96793	5.05195	7.08398	7.84533	7.6892		18:1n-7													6.5293	1.64994								18:1n-7	4.12182	4.02526	3.61839	3.84325	3.63277	4.02575	4.47379	3.53924	3.85456	3.37078	3.85056	0.325188
18:2n-6	7.7965	8.48986	6.79903	13.3151	4.38025	10.8244	11.8987	7.62048	9.1518	6.99984		18:2n-6		18:2n-6	10.5039	4.51456	4.50673	6.48884	7.37711	5.56104	6.09042	8.66782	6.39671	5.21098	7.62971	2.50962		3.34513	2.4405	3.38071	3.85603	2.93453	18:2n-6	18:2n-6	3.53148	2.75181	2.94522	3.60625	3.21171	3.5921	3.15721	2.84994	3.55915	3.09568	3.21716	0.385988		18:2n-6	6.82392
18:3n-3	2.81948	1.84412	1.98977	3.57272	1.06011	3.44746	3.78484	2.66935	1.97748	2.2296		18:3n-3		18:3n-3	5.85576	3.36983	2.2187	4.54893	4.46488	4.82054	3.02415	6.59832	5.52371	6.37154	3.60956	1.6069		3.72647	3.41078	2.7837	3.93364	0.83139	18:3n-3	18:3n-3	1.03986	1.34337	2.6913	1.22299	1.01047	0.882836	1.52995	2.59314	1.16976	0.973525	1.94288	1.12181		18:3n-3	7.58098
20:0	0.434455	0.0526872	0.348507	0.719168	0.260918	0.606731	0.703088	0.442992	0.678908	0.394761		20:0													0.464222	0.21569								20:0	0.168708	0.173771	0.153753	0	0.172652	0.168897	0.184319	0.153107	0.19931	0.169278	0.15438	0.0558751
20:1n-9	0.72313	0.722324	0.666613	0.847508	0.337045	0.791655	0.865572	1.38616	0.766366	0.726043		20:1n-9		20:1n-9	0.631891	0.571915	0.468203	0.636038	0.459305	1.11877	0.30794	1.07438	0.72793	0.200671	0.701473	0.283165		1.84646	1.0925	1.1258	3.66482	0.667345	20:1n-9	20:1n-9	0.368505	0.371889	0.425524	0	0.321056	0.639666	0.404604	0.405104	0.428016	0.320184	0.805432	0.910134		20:1n-9	1.77156
20:2n-6	1.59597	1.84102	1.01054	0.957291	0.604753	1.18724	1.26663	1.46718	1.7337	1.10757		20:2n-6		20:2n-6	1.01414	1.04397	1.58792	0.720225	1.10015	0.552188	1.14704	1.26764	1.29406	0.61683	1.1558	0.36797		0.461656	0.968862	1.54134	0.537025	0.281816	20:2n-6	20:2n-6	0.342788	0.254067	0.255828	0	0.333393	0.360469	0.26408	0.262221	0.283095	0.308516	0.430344	0.370313		20:2n-6	3.31487
20:4n-6	3.95879	4.52693	2.66036	3.29531	2.72417	4.45675	4.21894	3.40054	4.51231	2.61596		20:4n-6		20:4n-6	6.66724	9.64442	11.348	4.89232	14.1399	4.23699	13.9039	7.96068	9.0121	4.15223	6.11639	3.64883		3.80678	2.76408	3.7545	3.3842	11.1325	20:4n-6	20:4n-6	8.19708	10.3946	9.01005	8.90582	8.97061	8.51346	12.0991	9.38217	8.91831	9.07913	7.8875	2.96998		20:4n-6	0.408248
20:3n-3	0.616172	0.485037	0.456848	0.367093	0.226204	0.425563	0.502004	0.565553	0.567234	0.429344		20:3n-3		20:3n-3	0.818475	0.741011	0.679208	0.543634	1.10093	0.589738	0.902692	0.914483	0.924053	0.579493	0.621739	0.219324			0.421322	0.522175	0.748075	0.404343	20:3n-3	20:3n-3	0.203291	0.353116	0.500145	0	0.207411	0.214272	0.369144	0.478475	0.198889	0.216401	0.345504	0.187853		20:3n-3	3.7857
22:0	0.158331	0.231501	0	0.0671112	0.0434118	0.109334	0	0.20459	0	0.112297		22:0													0.0926576	0.0853861								22:0	0	0	0.0951875	0	0	0.0973813	0	0.0649476	0	0.0798652	0.0337382	0.0444195
22:1	0.0729888	0.202061	0	0.0713587	0.0940719	0.0526879	0.187073	0	4.51198	0.0601603		22:1		22:01n-9	0.401783	0.65423	0.486086	0.420198	0.517702	0.626198	0.348864	0.844113	1.07514	0.520429	0.557356	0.977913		0.261442	10.1299	13.977	7.78754	4.90396	22:01n-9	22:1	0	0	0.0409906	0	0	0.135213	0	0.0396278	0	0.0433844	2.48794	4.5506		22:01n-9	1.10219
20:5n-3	11.1935	9.0262	9.42704	11.3397	55.1341	6.8612	5.99925	10.0619	0.567234	9.59115		20:5n-3		20:5n-3	1.93913	3.75434	3.32026	2.02996	3.72638	1.40197	4.52573	2.78388	3.34391	6.93407	8.14804	11.583		2.18851	2.64227	2.22432	2.65129	2.08645	20:5n-3	20:5n-3	4.8296	5.78319	6.6212	5.11286	4.32598	4.83185	6.98304	7.04481	5.05424	4.33012	4.44732	1.75097		20:5n-3	2.15192
22:5 n-6	0	0	0	0	0	0	0	0	0	0		22:5 n-6													0	0								22:5 n-6	0	0	0	0	0	0	0	0	0	0	0	0
24:1	0	0	0	0	0	0	0	0	0	0		24:1		24:1 n-9	0.713678	1.11364	1.5748	0.576786	1.82093	0.391413	1.83172	0.748559	1.21996	0.415471	0.520348	0.656643		4.0193	2.39793	2.64459	1.95549	2.54044	24:1 n-9	24:1	0.232334	0.273596	0.18885	0	0	0.294925	0.315516	0.2405	0.252684	0.316939	1.04487	1.2921		24:1 n-9	0.752625
22:5 n-3	2.67156	2.39979	0.982208	2.92854	2.09931	2.4263	2.46226	2.52131	2.32477	2.39211		22:5 n-3		22:5n-3	1.93913	3.75434	3.32026	2.02996	3.72638	1.40197	4.52573	2.78388	3.34391	6.93407	2.84839	1.26404		2.18851	2.64227	2.22432	2.65129	2.08645	22:5n-3	22:5 n-3	2.76379	2.57879	2.52169	2.44569	2.20765	2.68566	2.98282	2.59123	2.51622	2.18337	2.48465	0.257008		22:5n-3	2.15192
22:6n-3	6.79584	4.50912	4.29166	8.95452	5.90834	7.53817	6.28163	5.86153	4.07745	4.54508		22:6n-3		22:6n-3	6.12394	13.1042	10.6005	4.29191	18.8169	4.01093	17.008	5.46	12.0128	3.41089	7.68017	4.43344		27.8026	32.5262	22.9156	21.176	29.9172	22:6n-3	22:6n-3	29.721	28.6487	24.0768	29.5247	29.1623	31.2157	21.6996	25.4495	30.3388	29.8806	27.6037	3.60813		22:6n-3	7.38767
24:0														24:0	4.7551	7.76127	6.8087	3.68094	9.47802	4.25379	8.1766	5.71562	8.98793	3.50583	6.31238	2.23162	1	0.902102	0.761423	1.57889	0.982217	0.822619	24												1.00945	0.328994		24:0	0.383451
n-3 HUFA	21.2771	16.4201	15.1577	23.5898	63.368	17.2512	15.2451	19.0102	7.53669	16.9577					10.8207	21.3539	17.9202	8.89546	27.3706	7.40461	26.9621	11.9422	19.6247	17.8585	19.2983	11.8372	0	32.1796	38.232	27.8864	27.2267	34.4945			37.5177	37.3638	33.7199	37.0832	35.9033	38.9475	32.0346	35.564	38.1082	36.6105	34.8581	3.63565	0	0	15.4772
SFA	26.3489	26.3269	25.4621	30.4658	12.9322	23.6174	20.4564	28.0135	28.4449	23.7792		SFA		SFA	29.5357	33.8746	33.0881	26.715	22.7733	28.3765	33.021	23.7465	21.9903	14.8106	25.689	5.51381		21.5174	20.71	20.5857	20.1103	25.6891	SFA	SFA	30.9265	31.3714	30.8508	32.3118	32.9941	29.8519	33.3135	30.6178	31.162	32.5142	28.3018	5.04864		SFA	21.0406
MUFA	36.2033	40.551	46.9205	24.8039	14.9305	39.2155	43.1293	37.8187	46.6431	46.3101		MUFA		MUFA	31.8575	24.3988	26.1612	40.631	20.8557	45.0689	15.7381	33.6936	31.5819	20.9095	33.3711	10.5127		13.5499	20.4186	25.794	25.2274	21.7776	MUFA	MUFA	18.4446	16.521	20.5269	16.8699	17.5764	17.8517	17.6016	18.7307	16.7995	17.4184	19.0072	3.27773		MUFA	37.3711
PUFA	37.4478	33.1221	27.6174	44.7303	72.1373	37.1671	36.4143	34.1678	24.912	29.9107		PUFA		PUFA	34.8617	39.9267	37.5816	25.5458	54.4526	22.5754	51.1276	36.4367	41.8513	34.2101	37.8098	11.4199		43.5196	47.8163	39.3467	38.9376	49.6748	PUFA	PUFA	50.6289	52.1077	48.6223	50.8183	49.4295	52.2964	49.085	50.6515	52.0385	50.0674	48.336	4.30642		PUFA	33.6052
n-3 PUFA	24.0965	18.2643	17.1475	27.1626	64.4281	20.6987	19.03	21.6796	9.51417	19.1873		n-3 PUFA		n3	16.6764	24.7237	20.1389	13.4444	31.8355	12.2251	29.9863	18.5406	25.1484	24.2301	22.9079	11.2904		35.9061	41.6428	30.6701	31.1603	35.3259	n3	n-3 PUFA	38.5575	38.7071	36.4112	38.3062	36.9138	39.8303	33.5646	38.1571	39.278	37.584	36.801	3.08468		n3	23.0582
n-6 PUFA	13.3513	14.8578	10.4699	17.5677	7.70917	16.4684	17.3843	12.4882	15.3978	10.7234		n-6 PUFA		n6	18.1852	15.203	17.4427	12.1014	22.6171	10.3502	21.1414	17.8961	16.7029	9.98004	14.9019	3.93243		7.61356	6.17344	8.67655	7.77725	14.3489	n6	n-6 PUFA	12.0713	13.4005	12.2111	12.5121	12.5157	12.466	15.5204	12.4943	12.7606	12.4833	11.535	2.67991		n6	10.547
n-3 HUFA	21.2771	16.4201	15.1577	23.5898	63.368	17.2512	15.2451	19.0102	7.53669	16.9577		n-3 HUFA		n-3 HUFA	10.8207	21.3539	17.9202	8.89546	27.3706	7.40461	26.9621	11.9422	19.6247	17.8585	19.2983	11.8372		32.1796	38.232	27.8864	27.2267	34.4945		n-3 HUFA	37.5177	37.3638	33.7199	37.0832	35.9033	38.9475	32.0346	35.564	38.1082	36.6105	34.8581	3.63565			15.4772
EPA+DHA	17.9893	13.5353	13.7187	20.2942	61.0425	14.3994	12.2809	15.9234	4.64468	14.1362	0.0968262	EPA+DHA		EPA+DHA	8.06307	16.8585	13.9207	6.32187	22.5433	5.4129	21.5337	8.24387	15.3568	10.345	15.8282	11.8111		29.9911	35.1685	25.1399	23.8273	32.0037	EPA+DHA	EPA+DHA	34.5506	34.4319	30.698	34.6375	33.4883	36.0476	28.6826	32.4943	35.3931	34.2107	32.051	3.73409	0.0232526	EPA+DHA	9.53959
n-3/n-6	1.80481	1.22927	1.63779	1.54616	8.35733	1.25687	1.09466	1.73601	0.617891	1.7893	0.0936334	n-3/n-6		n-3/n-6	0.917032	1.62624	1.15458	1.11098	1.40758	1.18115	1.41837	1.03601	1.50564	2.42785	1.74278	1.60578		4.71607	6.74549	3.53483	4.0066	2.46193	n-3/n-6	n-3/n-6	3.19414	2.88848	2.98181	3.06154	2.94939	3.19511	2.16261	3.05395	3.07808	3.01074	3.40272	1.09983	0.0166378	n-3/n-6	2.18623
AI	0.35726	0.376239	0.382203	0.445473	0.129649	0.293809	0.191815	0.418549	0.409335	0.316715	0.332105	AI		IA	0.423928	0.381312	0.416198	0.383168	0.127568	0.390986	0.321462	0.232966	0.172803	0.165578	0.316851	0.107111		0.395065	0.335076	0.333044	0.341336	0.317113	IA	AI	0.400279	0.39881	0.415537	0.437875	0.457797	0.379983	0.427499	0.398636	0.395176	0.438016	0.391416	0.0427403	0.414961	IA	0.374724
TI	0.2605	0.311045	0.307104	0.284779	0.0592965	0.251126	0.22335	0.297688	0.461377	0.264854	0.272112	TI		IT	0.326199	0.273157	0.315202	0.339684	0.112054	0.367914	0.226234	0.218682	0.128617	0.124828	0.257685	0.0959434		0.167582	0.137605	0.168529	0.167805		IT	TI	0.229322	0.232869	0.237991	0.243548	0.25495	0.21463	0.277424	0.228333	0.228184	0.246837	0.216829	0.0404822	0.239409	IT	0.216714
g FA/100g	1.734	2.3205	3.4255	1.3175	0.5695	0.663	0.884	1.768	1.9805	3.315				g FA/100g	1.8105	0.901	0.9265	2.567	2.1165	2.9325	0.6375	3.026	1.0625	3.57	1.87637	1.00216		0.5355	0.527	0.4675	0.9605	0.544	g FA/100g		0	0.612	0.6205	0.646	0.663	0.697	0.6205	0.6545	0.697	0.714	0.597267	0.200336		g FA/100g	3.791
														AVE Fat content g/100g																			AVE Fat content g/100g															AVE Fat content g/100g
														AVE EPA+DHA																			AVE EPA+DHA															AVE EPA+DHA
														SDEV EPA+DHA																			SDEV EPA+DHA															SDEV EPA+DHA
														AVE n-3																			AVE n-3															AVE n-3
mg FA/100g EPA+DHA	311.935	314.087	469.934	267.376	347.637	95.4679	108.563	281.525	91.9879	468.616					145.982	151.895	128.976	162.282	477.129	158.733	137.277	249.46	163.166	369.315	245.067	129.876		160.602	185.338	117.529	228.861	174.1			0	210.723	190.481	223.759	222.027	251.252	177.976	212.675	246.69	244.265	189.752	63.8995			361.646
	1.734	2.3205	3.4255	1.3175	0.5695	0.663	0.884	1.768	1.9805	3.315
	cejn velký	cejn velký	cejn velký	cejn velký	cejn velký	cejn velký	cejn velký	cejn velký	cejn velký	cejn velký			SD n-3		6.06157																				okoun říční	okoun říční	okoun říční	okoun říční	okoun říční	okoun říční	okoun říční	okoun říční	okoun říční	okoun říční
g FA / 100 g	1.734	2.3205	3.4255	1.3175	0.5695	0.663	0.884	1.768	1.9805	3.315	0	g FA / 100 g	mg FA/100g																					g FA / 100 g	0	0.612	0.6205	0.646	0.663	0.697	0.6205	0.6545	0.697	0.714			0
14:0	35.4228	55.6757	93.8274	31.3452	3.64472	10.34	1.48	45.8897	48.666	66.2854	0	14:0																						14:0	0	4.10381	7.7426	7.47658	7.48768	6.4065	4.06044	7.13225	6.01785	6.99414			0
14:1	5.54496	10.1827	12.0109	1.42828	0.333423	0	2.39651	4.86411	11.3957	14.5483	0	14:1																						14:1	0	0.302689	1.18491	0	0.458712	0.652847	0.346779	1.21359	0.516163	0.656279			0
16:0	314.569	420.509	600.569	282.723	49.7076	107.43	128.958	349.137	385.425	535.108	0	16:0																						16:0	0	151.088	147.324	161.561	173.425	160.16	160.653	152.494	165.534	183.081			0
16:1	148.102	215.327	453.08	176.257	15.3126	49.6106	67.206	181.038	191.92	396.179	0	16:1																						16:1	0	16.0909	27.2043	24.1921	29.3827	23.9576	16.1391	25.0655	22.2355	30.3926			0
18:0	96.6188	128.137	165.869	76.9603	18.5634	34.0665	44.1819	88.8034	115.816	170.079	0	18:0																						18:0	0	35.7375	34.8178	39.6964	36.6931	39.6454	40.8528	39.3401	44.2579	40.2975			0
18:1n-9	333.778	521.216	856.105	40.5971	50.3628	171.853	257.696	332.98	460.536	843.494	0	18:1n-9																						18:1n-9	0	56.1299	72.4617	59.96	60.4764	64.3	60.5036	68.6643	62.7297	64.3927			0
18:1n-7	126.536	172.81	263.23	96.4018	16.5654	32.9374	44.6592	125.245	155.377	254.897	0	18:1n-7																						18:1n-7	0	24.6346	22.4521	24.8274	24.0853	28.0595	27.7599	23.1643	26.8663	24.0673			0
18:2n-6	135.191	197.007	232.901	175.427	24.9455	71.7658	105.185	134.73	181.251	232.045	0	18:2n-6																						18:2n-6	0	16.8411	18.2751	23.2964	21.2937	25.0369	19.5905	18.6529	24.8073	22.1031			0
18:3n-3	48.8898	42.7929	68.1597	47.0706	6.03733	22.8567	33.458	47.1941	39.164	73.9114	0	18:3n-3																						18:3n-3	0	8.22144	16.6995	7.90049	6.69942	6.15336	9.49333	16.9721	8.15326	6.95097			0
20:0	7.53345	1.22261	11.9381	9.47504	1.48593	4.02262	6.2153	7.83209	13.4458	13.0863	0	20:0																						20:0	0	1.06348	0.954038	0	1.14468	1.17721	1.1437	1.00209	1.38919	1.20865			0
20:1n-9	12.5391	16.7615	22.8348	11.1659	1.91947	5.24867	7.65166	24.5073	15.1779	24.0683	0	20:1n-9																						20:1n-9	0	2.27596	2.64038	0	2.1286	4.45847	2.51057	2.65141	2.98327	2.28611			0
20:2n-6	27.6742	42.7209	34.6159	12.6123	3.44407	7.8714	11.197	25.9398	34.336	36.716	0	20:2n-6																						20:2n-6	0	1.55489	1.58741	0	2.2104	2.51247	1.63861	1.71623	1.97317	2.20281			0
20:4n-6	68.6455	105.047	91.1305	43.4157	15.5141	29.5483	37.2954	60.1215	89.3662	86.719	0	20:4n-6																						20:4n-6	0	63.6151	55.9074	57.5316	59.4751	59.3388	75.075	61.4063	62.1606	64.825			0
20:3n-3	10.6844	11.2553	15.6493	4.83645	1.28823	2.82148	4.43772	9.99897	11.2341	14.2327	0	20:3n-3																						20:3n-3	0	2.16107	3.1034	0	1.37513	1.49347	2.29054	3.13162	1.38625	1.54511			0
22:0	2.74546	5.37197	0	0.88419	0.24723	0.724884	0	3.61716	0	3.72265	0	22:0																						22:0	0	0	0.590639	0	0	0.678748	0	0.425082	0	0.570238			0
22:1	1.26563	4.68884	0	0.940151	0.53574	0.349321	1.65372	0	89.3598	1.99431	0	22:1																						22:1	0	0	0.254347	0	0	0.942436	0	0.259364	0	0.309764			0
20:5n-3	194.095	209.453	322.923	149.4	313.989	45.4898	53.0334	177.894	11.2341	317.947	0	20:5n-3																						20:5n-3	0	35.3931	41.0846	33.0291	28.6812	33.678	43.3298	46.1083	35.2281	30.9171			0
22:5 n-6	0	0	0	0	0	0	0	0	0	0	0	22:5 n-6																						22:5 n-6	0	0	0	0	0	0	0	0	0	0			0
24:1	0	0	0	0	0	0	0	0	0	0	0	24:1																						24:1	0	1.67441	1.17181	0	0	2.05563	1.95778	1.57407	1.76121	2.26294			0
22:5 n-3	46.3248	55.6871	33.6455	38.5836	11.9556	16.0864	21.7664	44.5767	46.0421	79.2985	0	22:5 n-3																						22:5 n-3	0	15.7822	15.6471	15.7992	14.6367	18.7191	18.5084	16.9596	17.5381	15.5893			0
22:6n-3	117.84	104.634	147.011	117.976	33.648	49.9781	55.5296	103.632	80.7538	150.669	0	22:6n-3																						22:6n-3	0	175.33	149.397	190.729	193.346	217.574	134.646	166.567	211.462	213.348			0
SFA	456.89	610.916	872.204	401.387	73.6489	156.584	180.835	495.279	563.352	788.281	0	SFA																						SFA	0	191.993	191.429	208.734	218.751	208.068	206.71	200.394	217.199	232.151			0
MUFA	627.765	940.986	1607.26	326.791	85.0294	259.999	381.263	668.634	923.766	1535.18	0	MUFA																						MUFA	0	101.108	127.37	108.979	116.532	124.427	109.218	122.593	117.092	124.368			0
PUFA	649.345	768.598	946.035	589.322	410.822	246.418	321.902	604.087	493.382	991.538	0	PUFA																						PUFA	0	318.899	301.701	328.286	327.718	364.506	304.572	331.514	362.709	357.481			0
n-3 PUFA	417.834	423.822	587.388	357.867	366.918	137.232	168.225	383.295	188.428	636.059	0	n-3 PUFA																						n-3 PUFA	0	236.888	225.931	247.458	244.738	277.617	208.268	249.738	273.767	268.35			0
n-6 PUFA	231.511	344.776	358.647	231.455	43.9037	109.185	153.677	220.791	304.954	355.48	0	n-6 PUFA																						n-6 PUFA	0	82.0111	75.7699	80.828	82.9792	86.8882	96.3041	81.7754	88.9411	89.1309			0
n-3 HUFA	368.944	381.029	519.229	310.796	360.881	114.376	134.767	336.101	149.264	562.147	0	n-3 HUFA																						n-3 HUFA	0	228.666	209.232	239.558	238.039	271.464	198.775	232.766	265.614	261.399			0
EPA+DHA	311.935	314.087	469.934	267.376	347.637	95.4679	108.563	281.525	91.9879	468.616	0	EPA+DHA																						EPA+DHA	0	210.723	190.481	223.759	222.027	251.252	177.976	212.675	246.69	244.265			0
[truncated: 81 more columns]

## Sheet: Final FAs
sample		AVE	STDEV		AVE	STDEV		AVE	STDEV		AVE	STDEV		AVE	STDEV		AVE	STDEV		AVE	STDEV
obsah tuku Fat content	Fat content	Abramis brama			Perca fluviatilis			Carassius gibelio			Chondrostoma nasus			Brown trout			Thymalus			Chub		Fat content
14:0	14:00:00	2.01673	0.799689		0.993816	0.22089		2.14666	0.462509		2.69166	0.881465		1.94934	0.584842		1.94162	0.570041		1.93074	0.286493	14:00:00
14:1	14:01:00	0.618356	0.448851		0.317413	0.34989		1.26406	2.19397		0.217106	0.0868784		0.323478	0.146308		0.06	0.08		0.577651	0.150289	14:01:00
16:0	16:0	14.2554	6.81503		22.3792	3.34985		17.3128	2.83402		16.1873	2.81831		18.575	4.19986		12.89	2.79		17.0894	1.11024	16:0
16:1	16:01:00	9.78471	5.32807		3.85114	1.33468		7.8114	2.09901		14.9992	4.7253		7.92275	2.71612		3.57	1.31		9.98533	2.05002	16:01:00
18:0	18:00:00	5.98222	2.12733		4.4669	2.35102		2.82905	2.54319		3.09296	0.358241		4.66636	1.0675		2.87	0.58		3.26358	0.424993	18:00:00
18:1n-9	18:1n-9	17.9242	9.1887		7.93338	2.92628		7.33298	5.6697		17.1153	1.94598		22.9418	15.8505		34.12	9.39		21.2254	2.46972	18:1n-9
18:2n-6	18:2n-6	7.62971	2.50962		3.21716	0.385988		7.11869	2.99621		5.13931	1.45029		5.91133	2.4669		16.29	2.87		8.22899	4.16335	18:2n-6
18:3n-3	18:3n-3	3.60956	1.6069		1.94288	1.12181		5.34983	2.63252		2.28979	1.13963		6.75346	4.37366		2.54217	0.699072		4.99368	0.497148	18:3n-3
20:0		0.464222	0.21569		0.15438	0.0558751		0.280426	0.10884		0.25048	0.0920979		0.323989	0.113164		0.144672	0.12599		0.354756	0.0641457
20:1n-9	20:1n-9	0.701473	0.283165		0.805432	0.910134		1.41023	0.320375		2.09325	2.84633		0.799101	0.557161		2.63498	0.609909		0.924634	0.111379	20:1n-9
20:2n-6	20:2n-6	1.1558	0.36797		0.430344	0.370313		3.78901	2.43259		0.395287	0.100029		0.681896	0.761648		1.11849	1.69182		1.04338	0.932471	20:2n-6
20:4n-6	20:4n-6	6.11639	3.64883		7.8875	2.96998		1.99883	2.27417		2.40503	3.83305		2.72977	1.38324		1.10022	0.573786		3.86864	0.630571	20:4n-6
20:3n-3	20:3n-3	0.621739	0.219324		0.35	0.19		3.31438	2.10117		0.399134	0.1958		0.614117	0.221999		0.188159	0.044725		0.822226	0.173788	20:3n-3
22:0		0.0926576	0.0853861		0.0337382	0.0444195		0.0803362	0.0352266		0.0696677	0.0410046		0.195104	0.062172		0	0		0.00865049	0.017301
22:1	22:01n-9	0.557356	0.977913		2.48794	4.5506		0.750116	0.538654		0.596855	0.44608		0.877536	0.591253		0.348032	0.0917932		0.807978	1.2001	22:01n-9
20:5n-3	20:5n-3	8.14804	11.583		4.44732	1.75097		3.85297	1.79395		6.82442	5.02362		2.02617	0.920801		2.315	1.5441		3.38677	1.48467	20:5n-3
obsah tuku Fat content		Abramis brama			Perca fluviatilis			Carassius gibelio			Chondrostoma nasus			Brown trout			Thymalus			Chub		Fat content
24:1	24:1 n-9	0.520348	0.656643		1.04487	1.2921		0.870313	0.775138		2.15066	1.67523		1.24586	0.908544		0.39897	0.32286		0.492099	0.56807	24:1 n-9
22:5 n-3	22:5n-3	2.84839	1.26404		2.48465	0.257008		2.71781	0.679763		3.02	0.629456		1.60219	0.431352		1.08158	0.355827		1.89331	0.313412	22:5n-3
22:6n-3	22:6n-3	7.68017	4.43344		27.6037	3.60813		13.1887	4.99579		7.32807	2.36587		12.8347	8.75927		12.9464	7.33051		10.4751	4.22745	22:6n-3
24:0	24:0	6.31238	2.23162		1.00945	0.328994		0.696343	0.248084		0.238763	0.0426888		0.533946	0.400738		2.05591	0.405657		1.53131	1.70124	24:0
SFA	SFA	25.689	5.51381		28.3018	5.04864		22.8816	4.41442		22.2403	3.65093		25.7197	5.18164		17.75	4.34		23.2311	1.25751	SFA
MUFA	MUFA	37.9356	10.6273		21.765	7.0062		35.5894	11.1141		42.1674	5.53312		38.7098	13.3461		43.98	9.85		40.6247	3.02507	MUFA
PUFA	PUFA	37.8098	11.4199		49.0428	4.32943		41.3302	6.10261		27.801	5.90754		33.1537	8.72463		37.8	7.07		34.7121	2.80158	PUFA
n-3 PUFA	n3	22.9079	11.2904		37.5078	3.95642		28.4237	4.55127		19.8614	5.13479		23.8307	8.79446		19.0733	8.40378		21.5711	3.0926	n3
n-6 PUFA	n6	14.9019	3.93243		11.535	2.67991		12.9065	2.88634		7.93963	4.9255		9.32301	3.73985		18.73	3.09		13.141	3.98096	n6
n-3 HUFA	n-3 HUFA	19.2983	11.84		34.86	3.64		23.07	6.27		17.57	4.49		17.08	8.72		16.53	8.95		7.20854	6.87837
EPA+DHA	EPA+DHA	15.8282	11.8111		32.051	3.73409		17.0417	6.44251		14.1525	4.29238		14.8609	8.60684		15.2614	8.64432		13.8619	3.15802	EPA+DHA
n-3/n-6	n-3/n-6	1.74278	1.60578		3.49555	1.26498		2.286	0.535956		3.18978	1.84103		2.94762	1.38547		1.1	0.76		1.87504	0.806998	n-3/n-6
AI	IA	0.302131	0.110133		0.375125	0.0617088		0.345306	0.0726195		0.386946	0.0871433		0.37403	0.095907		0.24	0.08		0.32954	0.0295323	IA
TI	IT	0.252601	0.0962447		0.211405	0.045474		0.203307	0.0491891		0.251277	0.0226999		0.264587	0.0729033		0.19	0.06		0.241552	0.0351356	IT
	g FA/100g	1.87637	1.00216		0.597267	0.200336		1.734	1.11		3.30418	1.07797		2.78871	0.815103		2.27912	1.03323		2.70534	1.01594	g FA/100g

## Sheet: ALL individual data
	Bream	Protein			Bream	Dry matter					Bream	lipid				Bream	Ash			Bream	Moisture
Reka Orlice	Common bream 4	19.9			cejn 1 Orlice	22.05	22.05			1	cejn 1 Orlice	2.03922				cejn 1 Orlice	1.2				77.95	77.95
Reka Orlice	Common bream 5	18.2			cejn 2 Orlice	21.3	21.3			1	cejn 2 Orlice	2.73267				cejn 2 Orlice	1.19				78.7	78.7
Reka Orlice	Common bream 6	20.7			cejn 3 Orlice	22.92	22.92			2	cejn 3 Orlice	2.49				cejn 3 Orlice	1.4				77.08	77.08
Reka Labe	Common bream 1	18.8			cejn 2 Labe	19.88	19.88			3	cejn 2 Labe	2.08163				cejn 2 Labe	1.36				80.12	80.12
Reka Labe	Common bream 2	20.5			cejn 1 Labe	20.47	20.47			4	cejn 1 Labe	2.32692				cejn 1 Labe	1.15				79.53	79.53
Reka Labe	Common bream 3	18.1			cejn 3 Labe	20.36	20.36									cejn 3 Labe	1.03				79.64	79.64
Svitava	Common bream 7	16.919			svitava	22.2246	39.7635			6	svitava	2.13				svitava	1.48101				77.7754	60.2365
Svitava	Common bream 8	16.855			svitava	22.05	20.0837			7	svitava	1.06				svitava	1.5936				77.95	79.9163
Svitava	Common bream 9	17.141			svitava	21.3	19.3567			8	svitava	1.09				svitava	1.4992				78.7	80.6433
Svitava	Common bream 10	17.139			svitava	22.92	22.3			9						svitava	1.30343				77.08	77.7
Svitava	Common bream 11	17.166			svitava	21.3	19.4515			10	svitava	2.49				svitava	1.52551				78.7	80.5485
Svitava	Common bream 12	17.25			svitava	19.3567	22.2246									svitava	1.47073				80.6433	77.7754
Svitava	Common bream 13	16.794			Anova no sig					12	svitava	0.75				Anova no sig				AVE	78.6557	77.4867
Svitava	Common bream 14	16.859			AVE	21.3443	22.5133			13	svitava	3.56				AVE	1.35029
Svitava	Common bream 15	18.21								14	svitava	1.25
Svitava	Common bream 16	18.193								15	svitava	4.2	Anova no sig
Svitava	Common bream 17	17.639									AVE	2.16926
	AVE	18.0215								5	cejn 3 Labe	3.56
										9	svitava	3.02
										11	svitava	3.45
	Thymalus	Protein			Thymalus	Dry matter					Thymalus	lipid				Thymalus	Ash			Thymalus	Moisture
extensive tok	European grayling 1	17.3			Etxensive tok	22.7357					Etxensive tok	3.28972		3.28972	350	Etxensive tok	2.10829				77.2643
extensive tok	European grayling 2	17			Etxensive tok	19.1446					Etxensive tok	2.18692		2.18692	200	Etxensive tok	2.38529				80.8554
extensive tok	European grayling 3	18.7			Etxensive tok	20					Etxensive tok	2.33333		2.33333	250	Etxensive tok	2.14051				80
extensive tok	European grayling 4	17.9			Etxensive tok	19.1617					Etxensive tok	0.970874		0.970874	100	Etxensive tok	2.27745				80.8383
extensive tok	European grayling 5	18.2			Etxensive tok	20.4					Etxensive tok	2.06452		2.06452	200	Etxensive tok	2.10354				79.6
extensive tok	European grayling 6	17.5			Etxensive tok	18.5484					Etxensive tok	0.904348		0.904348	100	Etxensive tok	2.08298	2.18301			81.4516
					Etxensive tok	20.8984					Etxensive tok	2.92623		2.92623	200	Tepla vltava	1.7379				79.1016
					Etxensive tok	20.5455	20.1793				Etxensive tok	2.3125	2.12355	2.3125	200	Tepla vltava	1.98661				79.4545	79.8207
Tepla vltava		17.134			Tepla vltava	25.3499					Tepla vltava	5.16		5.16	500	Tepla vltava	1.64525				74.6501
Tepla vltava		17.198			Tepla vltava	19.9354	rep ham has dar data khodam				Tepla vltava	1.41		1.41	200	Tepla vltava	1.91294				80.0646
Tepla vltava		16.85			Tepla vltava	23.7784					Tepla vltava	3.37		3.37	300	T.TEST	0.00326327	1.82068			76.2216
Tepla vltava		16.867			Tepla vltava	23.2437					Tepla vltava	2.58		2.58	300	AVE	2.03808	2.00184			76.7563
Tepla vltava		17.685			Tepla vltava	22.6229					Tepla vltava	3.94		3.94	400						77.3771
Tepla vltava		17.682			Tepla vltava	22.2238				rep ham has dar data khodam	Tepla vltava	4.09		4.09	400						77.7762	77.141
Tepla vltava		16.769			Tepla vltava	22.8959					T.TEST	0.0416541	3.425								0.00715795
Tepla vltava		16.605			Tepla vltava	22.1881					AVE	2.68132	2.77428								78.6723	78.4809
Tepla vltava		17.397			Tepla vltava	23.4143																78.4397
Tepla vltava		17.426			Tepla vltava	23.7614	22.9414
Tepla vltava		17.378			T.test	0.000585254
Tepla vltava		17.435			AVE	22.69	21.5603
AVE		17.3903								rep ham has dar data khodam
									23.7614
	Chub	Protein			Chub	Dry matter					Chub	lipid				Chub	Ash			Chub	Moisture
extensive tok	Chub 1	22.7			Extensivi tok	24.788					Extensivi tok	3.79169				Extensivi tok	2.31194				75.212
extensive tok	Chub 2	20.4			Extensivi tok	24.7995					Extensivi tok	3.79393				Extensivi tok	2.21591				75.2005
extensive tok	Chub 3	21.6			Extensivi tok	25.0678					Extensivi tok	3.67421				Extensivi tok	2.45242				74.9322
extensive tok	Chub 4	22.1			Extensivi tok	24.6941					Extensivi tok	3.91006				Extensivi tok	2.17294				75.3059
extensive tok	Chub 5	21			Extensivi tok	25.2286					Extensivi tok	4.18759	3.8715			Extensivi tok	2.19149				74.7714
extensive tok	Chub 6	21.4			Luznice						Luznice	3.58				Extensivi tok	2.15434				75.0844
Luznice	Chub1	17.361			Luznice						Luznice	3.77				Luznice	1.25687			AVE
Luznice	Chub1	17.384			Luznice						Luznice	2.14				Luznice	1.29392
Luznice	Chub2	17.986			Luznice						Luznice	2.98	3.1175			Luznice	1.3069
Luznice	Chub2	17.902			Luznice						T.TEST	0.0603196				Luznice	1.28295
Luznice	Chub3	17.566			Luznice						AVE	3.53639	3.4945			T.TEST	1.86006e-07
Luznice	Chub3	17.55			Luznice											AVE	1.86397
Luznice	Chub4	16.755			Luznice
Luznice	Chub4	16.774			Luznice
	AVE	19.177			Luznice
					T.TEST
					AVE	24.9156
	Brown trout	Protein			Brown trout	Dry matter					Brown trout	lipid				Brown trout	Ash			Brown trout	Moisture
Reka Loucna	Brown trout 1	22			Reka Loucna	27.21	I dont have individual data from him so this is average				Reka Loucna	4.07				Reka Loucna	1.50381				72.79
Reka Loucna	Brown trout 2	22			Reka Loucna	24.97	25.4				Reka Loucna	2.69	3.4325			Reka Loucna	1.18149				75.03
Tepla vltava	B 2	18.459			Tepla vltava	19.6159	26.09				Reka Loucna	4.09				Tepla vltava	1.52881				80.3841
Tepla vltava	B 2.	18.487			Tepla vltava	23.8063					Reka Loucna	2.88				Tepla vltava	1.80311				76.1937
Tepla vltava	B 3	18.33			Tepla vltava	22.1548					Tepla vltava	1.64				Tepla vltava	1.69734				77.8452
Tepla vltava	B 3.	18.382			Tepla vltava	24.8886					Tepla vltava	3				Tepla vltava	1.58183				75.1114
Tepla vltava	B 4.	18.562			Tepla vltava	24.7282					Tepla vltava	2.44				Tepla vltava	1.62893				75.2718
Tepla vltava	B 5	18.396			Tepla vltava	24.2624					Tepla vltava	5.15				T.TEST	0.0473788				75.7376
Tepla vltava	B 5.	18.374			T.TEST	0.125981					Tepla vltava	4.48					1.56076			T.TEST	0.125981
AVE		19.2211			AVE	23.9966					Tepla vltava	3.44	3.205
					Tepla vltava	24.488	rep ham has dar data khodam				Tepla vltava	3.09									75.512
					Tepla vltava	24.0329					Tepla vltava	2.4	3.31875								75.9671
					Tepla vltava	24.5718					T.TEST	0.84913									75.4282
					Tepla vltava	24.7274					AVE	3.28083									75.2726
					Tepla vltava	22.4996															77.5004
					Tepla vltava	19.6371															70.5836
	Condrostomata	Protein			Condrostomata	Dry matter					Condrostomata	lipid				Condrostomata	Ash			Condrostomata	Moisture
Orlice	cond	19.2			Orlice	22.9703					Orlice	3.35				Orlice	1.39855				80.8
Orlice	cond	19.5			Orlice	24.7505					Orlice	6.19				Orlice	1.32756				80.5
Orlice	cond	19.4			Orlice	23.2604					Orlice	5.4				Orlice	1.32024				80.6
Tepla vltava	cond	17.137			Tepla Vltava	26.0759					Orlice	3.53	4.6175			Tepla Vltava	1.18716				82.863
Tepla vltava	cond	17.396			Tepla Vltava	22.1204					Tepla Vltava	5.88				Tepla Vltava	1.19543				82.604
Tepla vltava	cond	17.408			Tepla Vltava	23.6861					Tepla Vltava	3.97				Tepla Vltava	1.18924				82.592
Tepla vltava	cond	17.18			Tepla Vltava	21.6836					Tepla Vltava	2.18				Tepla Vltava	1.1849				82.82
Tepla vltava	cond	17.304			Tepla Vltava	23.6295					Tepla Vltava	3.14				Tepla Vltava	1.20348				82.696
Tepla vltava	cond	17.857			Tepla Vltava	22.4542					Tepla Vltava	2.81				Tepla Vltava	1.26183				82.143
Tepla vltava	cond	17.829			T.TEST	0.716116					Tepla Vltava	3.14				T.TEST	0.000510478				82.171
Tepla vltava	cond	16.67			AVE	23.4034					Tepla Vltava	3.17	3.47			AVE	1.25204				83.33
Tepla vltava	cond	16.657			Tepla Vltava	22.315					T.TEST	0.180891									83.343
Tepla vltava	cond	16.815			Tepla Vltava	22.9009					AVE	3.88727	4.04375								83.185
Tepla vltava	cond	16.705			Tepla Vltava	26.2842	Rep ham has														83.295
	AVE	17.647			Tepla Vltava	21.6402															2.36232e-06
					Tepla Vltava	23.9453
					AVE
	Eurasisan perch	Protein			Eurasisan perch	Dry matter					Eurasisan perch	lipid				Eurasisan perch	Ash			Eurasisan perch	Moisture
pond	Eurasian perch 1	19.3			Pond	17.2619	pond	18.6223			Pond	0.72				Pond	1.75037				80.7
pond	Eurasian perch 2	19.1			Pond	18.6	pond	19.0827			Pond	0.73	0.725			Pond	1.80538				80.9
pond	Eurasian perch 3	20.6			Pond	19.4059	pond	21.6402			Pond	0.76	0.77			Pond	1.15618				79.4
pond	Eurasian perch 4	20.1			Pond	18.5404	pond	23.9453			Pond	0.78				Pond	1.32539				79.9
pond	Eurasian perch 5	19.2			Pond	18.5259	pond	22.3			Pond	0.82	0.775			Pond	1.12072				80.8
Luznice		16.207			Luznice	18.6223	Luznice	24.5			Pond	0.73				Luznice	4.80674				83.793
Luznice		16.106			Luznice	19.0827	Luznice	25			Pond	0.79	0.81			Luznice	4.65869				83.894
Luznice		18.314			T.TEST	0.540614	Luznice	17.2619			Pond	0.83				Luznice	4.66676				81.686
Luznice		18.305			AVE	18.577	Luznice	18.6			Pond	0.84	0.84		0.784	Luznice	2.7381				81.695
Luznice		17.949					Luznice	19.4059			Luznice	0.65	0.63			Luznice	1.39593				82.051
Luznice		17.946					Luznice	18.5404			Luznice	0.69	0.62			T.TEST	0.0128867				82.054
Luznice		14.038					Luznice	22.4			Luznice	0.57	0.55			AVE	2.54243				85.962
Luznice		14.065						20.9416			Luznice	0.64	0.64		0.61						85.935
Luznice		16.73					T.TEST	0.85718			T.TEST	0.000419569	0.000481022								83.27
Luznice		16.745										AVE	0.706667		0.697						83.255
Luznice		17.581										0.734615									82.419
Luznice		17.519																			82.481
AVE		17.6356																		0.00440794	0.000960824
	Crass	Protein			Crass	Dry matter					Crass	lipid				Crass	Ash			Crass	Moisture
Extenzivni rybnik	Prussian carp 1	19.9			Extenzivni rybnik	21.08					Extenzivni rybnik	1.78				Extenzivni rybnik	0.784117				80.1
Extenzivni rybnik	Prussian carp 2	20.5			Extenzivni rybnik	20.16					Extenzivni rybnik	1.09				Extenzivni rybnik	0.774252				79.5
Extenzivni rybnik	Prussian carp 3	19.6			Svitava	23.1282					Extenzivni rybnik	0.79				Extenzivni rybnik	1.00305				80.4
Svitava	Carassius	16.776			Svitava	18.246					Extenzivni rybnik	0.91	1.1425			Svitava	1.20316				83.224
Svitava	Carassius	16.674			Svitava	21.0151					Svitava	4.49				Svitava	1.20823				83.326
Svitava	Carassius	16.954			Svitava	20.0465					Svitava	2.03				Svitava	1.09634				83.046
Svitava	Carassius	16.967			Svitava	22.4445					Svitava	2.2				Svitava	1.09836				83.033
Svitava	Carassius	16.033			Svitava	20.5448					Svitava	4.46				Svitava	1.15402				83.967
Svitava	Carassius	15.975			T.TEST	0.836684					Svitava	2.09				Svitava	1.40533				84.025
Svitava	Carassius	16.283			AVE	20.8331					Svitava	1.67				T.TEST	0.00484155				83.717
Svitava	Carassius	16.326									Svitava	2.37				AVE	1.08076				83.674
Svitava	Carassius	16.218									Svitava	2.64	2.74375								83.782
Svitava	Carassius	16.077									T.TEST	0.0208922									83.923
Svitava	Carassius	16.03									AVE	2.21	1.94312								83.97
Svitava	Carassius	16.072																			83.928
	AVE	17.0923																		0.000320921	2.1396e-09

## Sheet: ASH
		Ash in 550◦ Furnace
			mix flesh properties	Flesh	Curcible	curcible+sample weight	After 6h	After 12h	Ash content				popel	%popela
		Carassius 1	344.6 g	5.0215	35.6544	40.6736	35.7209	34.426	6.2476				0.0665	1.32431
		Carassius 2	622.9	5.0424	37.1494	42.1907	37.2039	34.7853	7.4054				0.0545	1.08083
		Carassius 3		5.0427	34.3653	39.4001	34.4228	35.7148	3.6853				0.0575	1.14026
		Carassius 4	1082.4	5.1495	34.7299	39.877	34.7808	36.2433	3.6337				0.0509	0.988445
		Carassius 5	425.1	5.103	36.1826	41.2834	36.2385	37.2039	4.0795				0.0559	1.09543
		Carassius 6	344	5.1132	37.648	42.7594	37.7096	37.7089	5.0505				0.0616	1.20473		1.139	0.115419
TEKRAR KARDAM		Cara1		5.0035	35.5728	40.5753	35.633	35.6369	4.9384				0.0602	1.20316
		Cara2		5.0901	33.45	38.5411	33.5115	33.5075	5.0336				0.0615	1.20823
		Cara3		5.0258	37.0595	42.0842	37.1146	37.1108	4.9734				0.0551	1.09634
		Cara4		5.0803	34.761	39.8397	34.8168	34.8122	5.0275				0.0558	1.09836
		Cara5		5.0259	34.1219	39.1479	34.1799	34.1772	4.9707				0.058	1.15402
		Cara6		5.0166	37.3948	42.409	37.4653	37.466	4.943				0.0705	1.40533		1.19424	0.114219
		Abramis 1		5.0641	34.1166	39.1776	34.1916	34.192	4.9856				0.075	1.48101
		Abramis 2		5.0389	35.427	40.4611	35.5073	35.5097	4.9514				0.0803	1.5936
		Abramis 3		5.1561	35.6553	40.8069	35.7326	35.7329	5.074				0.0773	1.4992
		Abramis 4		5.0482	34.3652	39.4115	34.431	34.4298	4.9817				0.0658	1.30343
		Abramis 5		5.2376	37.1515	42.2869	37.2314	37.2342	5.0527				0.0799	1.52551
		Abramis 6		5.1063	34.7295	39.8345	34.8046	34.8085	5.026				0.0751	1.47073		1.47891	0.09654
		Perch 135		5.1615	37.3973	42.5548	37.6454	37.6454	4.9094				0.2481	4.80674
		Perch 165		5.1259	36.181	41.304	36.4198	36.4198	4.8842				0.2388	4.65869
		Perch 139		5.1599	35.5757	40.7384	35.8165	35.8165	4.9219				0.2408	4.66676
		Perch 109,7		5.3833	37.0542	42.4358	37.2016	37.2016	5.2342				0.1474	2.7381
		Perch 155		5.2295	35.6547	40.8815	35.7277	35.7277	5.1538				0.073	1.39593		3.65324	1.52493
		Cond 607g		5.2394	35.4292	40.6685	35.4914	35.4914	5.1771				0.0622	1.18716
		Cond 551g		5.2115	37.6497	42.8583	37.712	37.712	5.1463				0.0623	1.19543
		Cond 465g		5.1209	34.3678	39.4845	34.4287	34.4287	5.0558				0.0609	1.18924
		Cond 520g		5.3169	33.4545	38.7706	33.5175	33.5175	5.2531				0.063	1.1849
		Cond 611g		5.1351	37.1546	42.2857	37.2164	37.2164	5.0693				0.0618	1.20348
		Cond 33g		5.1037	34.1254	39.2272	34.1898	34.1898	5.0374				0.0644	1.26183		1.20367	0.0292692
		Brown trout 1	87,7 g	5.259	35.6541	40.9134	35.7345	35.7345	5.1789				0.0804	1.52881
		Brown 5	140,7 g	5.2354	37.3975	42.6327	37.4919	37.4919	5.1408				0.0944	1.80311
		Brown 6	88,2 g	5.2494	37.0533	42.303	37.1424	37.1424	5.1606				0.0891	1.69734
		Brown 8	59 g	5.1017	34.7291	39.8308	34.8098	34.8098	5.021				0.0807	1.58183
		Brown 3	135,7 g	5.476	35.4297	40.9058	35.5189	35.5189	5.3869				0.0892	1.62893		1.648	0.106587
		Chub 4	144 g	5.0204	37.6482	42.6691	37.7113	37.7113	4.9578				0.0631	1.25687
		Cuhb1	109,22 g	5.2708	34.1154	39.3879	34.1836	34.1836	5.2043				0.0682	1.29392
		Chub 3	250 g	5.3868	37.1525	42.5385	37.2229	37.2229	5.3156				0.0704	1.3069
		Chub2	604 g	5.4484	35.5748	41.0236	35.6447	35.6447	5.3789				0.0699	1.28295		1.28516	0.021248
		Thym 1	437,1 g	5.0348	36.1811	41.2165	36.2686	36.2686	4.9479				0.0875	1.7379
		Thym2	436,9 g	5.0941	33.4522	36.5504	33.5534	33.5534	2.997				0.1012	1.98661
		Thym		5.215	34.1249	39.3392	34.2107	34.2107	5.1285				0.0858	1.64525
		Thym		5.1067	34.3663	39.4752	34.6438	34.6438	4.8314				0.2775	5.43404
		Thym	335,5g	5.4471	34.7588	40.2048	34.863	34.863	5.3418				0.1042	1.91294		2.54335	1.62163

## Sheet: EPA+DHA
			Common nase	Chub	Grayling	Brown trout	Freshwater bream	Prussian carp	European perch
Tomas work
		EPA+DHA	790.036	379.04	347.45	305.824	265.036	225.747	216.174
														Common nase	Brown trout	European chub	European grayling	Prussian carp	Common bream	European perch
														471.05	378.408	347.09	281.405	272.114	245.07	189.752
